# Supplementary material for: Spatial predictors of response to immunotherapy in microsatellite stable metastatic colorectal cancer
Source: Research Square preprint supplement (doi:10.21203/rs.3.rs-5434411/v1), 2024-11-28
Supplement: Supplementary file 1 [file 0ffb4f7cad8cfa78f72c7309.docx]

Supplementary Table 1: 40 protein biomarkers used in the COMET staining panel

| CD3 | CD4 | CD8 | CD11b | CD11c | CD14 | CD15 | CD16 |
| --- | --- | --- | --- | --- | --- | --- | --- |
| CD19 | CD20 | CD21 | CD31 | CD34 | CD38 | CD39 | CD45 |
| CD45RA | CD45RO | CD56 | CD68 | CD163 | GZMB | FoxP3 | HLA-DR |
| VISTA | PD1 | LAG-3 | Tryptase | Lamin A | BDCA-2 | Eomes | CK |
| E-Cadherin | PD-L1 | S100 | Podoplanin | ICOS | Ki67 | IDO-1 | aSMA |
