# Supplementary material for: Spatial predictors of response to immunotherapy in microsatellite stable metastatic colorectal cancer
Source: Research Square preprint supplement (doi:10.21203/rs.3.rs-5434411/v1), 2024-11-28
Supplement: Supplementary file 2 [file e4ca0b9ce4875a3efebeac10.docx]

Supplementary Table 2: Antibody panel for peripheral flow cytometry

| **S/N** | **Fluorophore** | **Marker** | **Company** |
| --- | --- | --- | --- |
|  | Surface markers | | |
| 1 | BB630 | CD56 | BD Biosciences |
| 2 | BB660 | CD19 | BD Biosciences |
| 3 | BB700 | TIGIT | BD Biosciences |
| 4 | BB790 | CD45 | BD Biosciences |
| 5 | BUV395 | CD3 | BD Biosciences |
| 6 | BUV496 | Live Dead | Thermofisher |
| 7 | BUV563 | CD16 | BD Biosciences |
| 8 | BUV615 | TIM3 | BD Biosciences |
| 9 | BUV661 | PD-L1 | BD Biosciences |
| 10 | BUV737 | CD123 | BD Biosciences |
| 11 | BUV805 | CD14 | BD Biosciences |
| 12 | APC-R700 | CD8 | BD Biosciences |
| 13 | R718 | CD206 | BD Biosciences |
| 14 | APC-Vio770 | CD172a | Miltenyi Biotec |
| 15 | Pe-CF594 | PD1 | BD Biosciences |
| 16 | Pe-Cy7 | FceR1a | Biolegend |
| 17 | Pe-Fire810 | HLA-DR | Biolegend |
| 18 | BV510 | CD15 | BD Biosciences |
| 19 | BV570 | CD11b | Biolegend |
| 20 | BV605 | CD141 | BD Biosciences |
| 21 | BV750 | CD4 | BD Biosciences |
| 22 | BV786 | CD33 | BD Biosciences |
|  | Intracellular markers | | |
| 23 | FITC | IDO | eBioscience |
| 24 | APC | CD68 | Miltenyi Biotec |
| 25 | PE | Foxp3 | BD Biosciences |
| 26 | Pe-Cy5 | CTLA4 | BD Biosciences |
| 27 | BV421 | GZMB | BD Biosciences |
| 28 | BV480 | Ki67 | BD Biosciences |
| 29 | BV711 | Perforin | Biolegend |
