# Supplementary figures and images for: Spatial predictors of response to immunotherapy in microsatellite stable metastatic colorectal cancer
Source: Research Square preprint supplement (doi:10.21203/rs.3.rs-5434411/v1), 2024-11-28

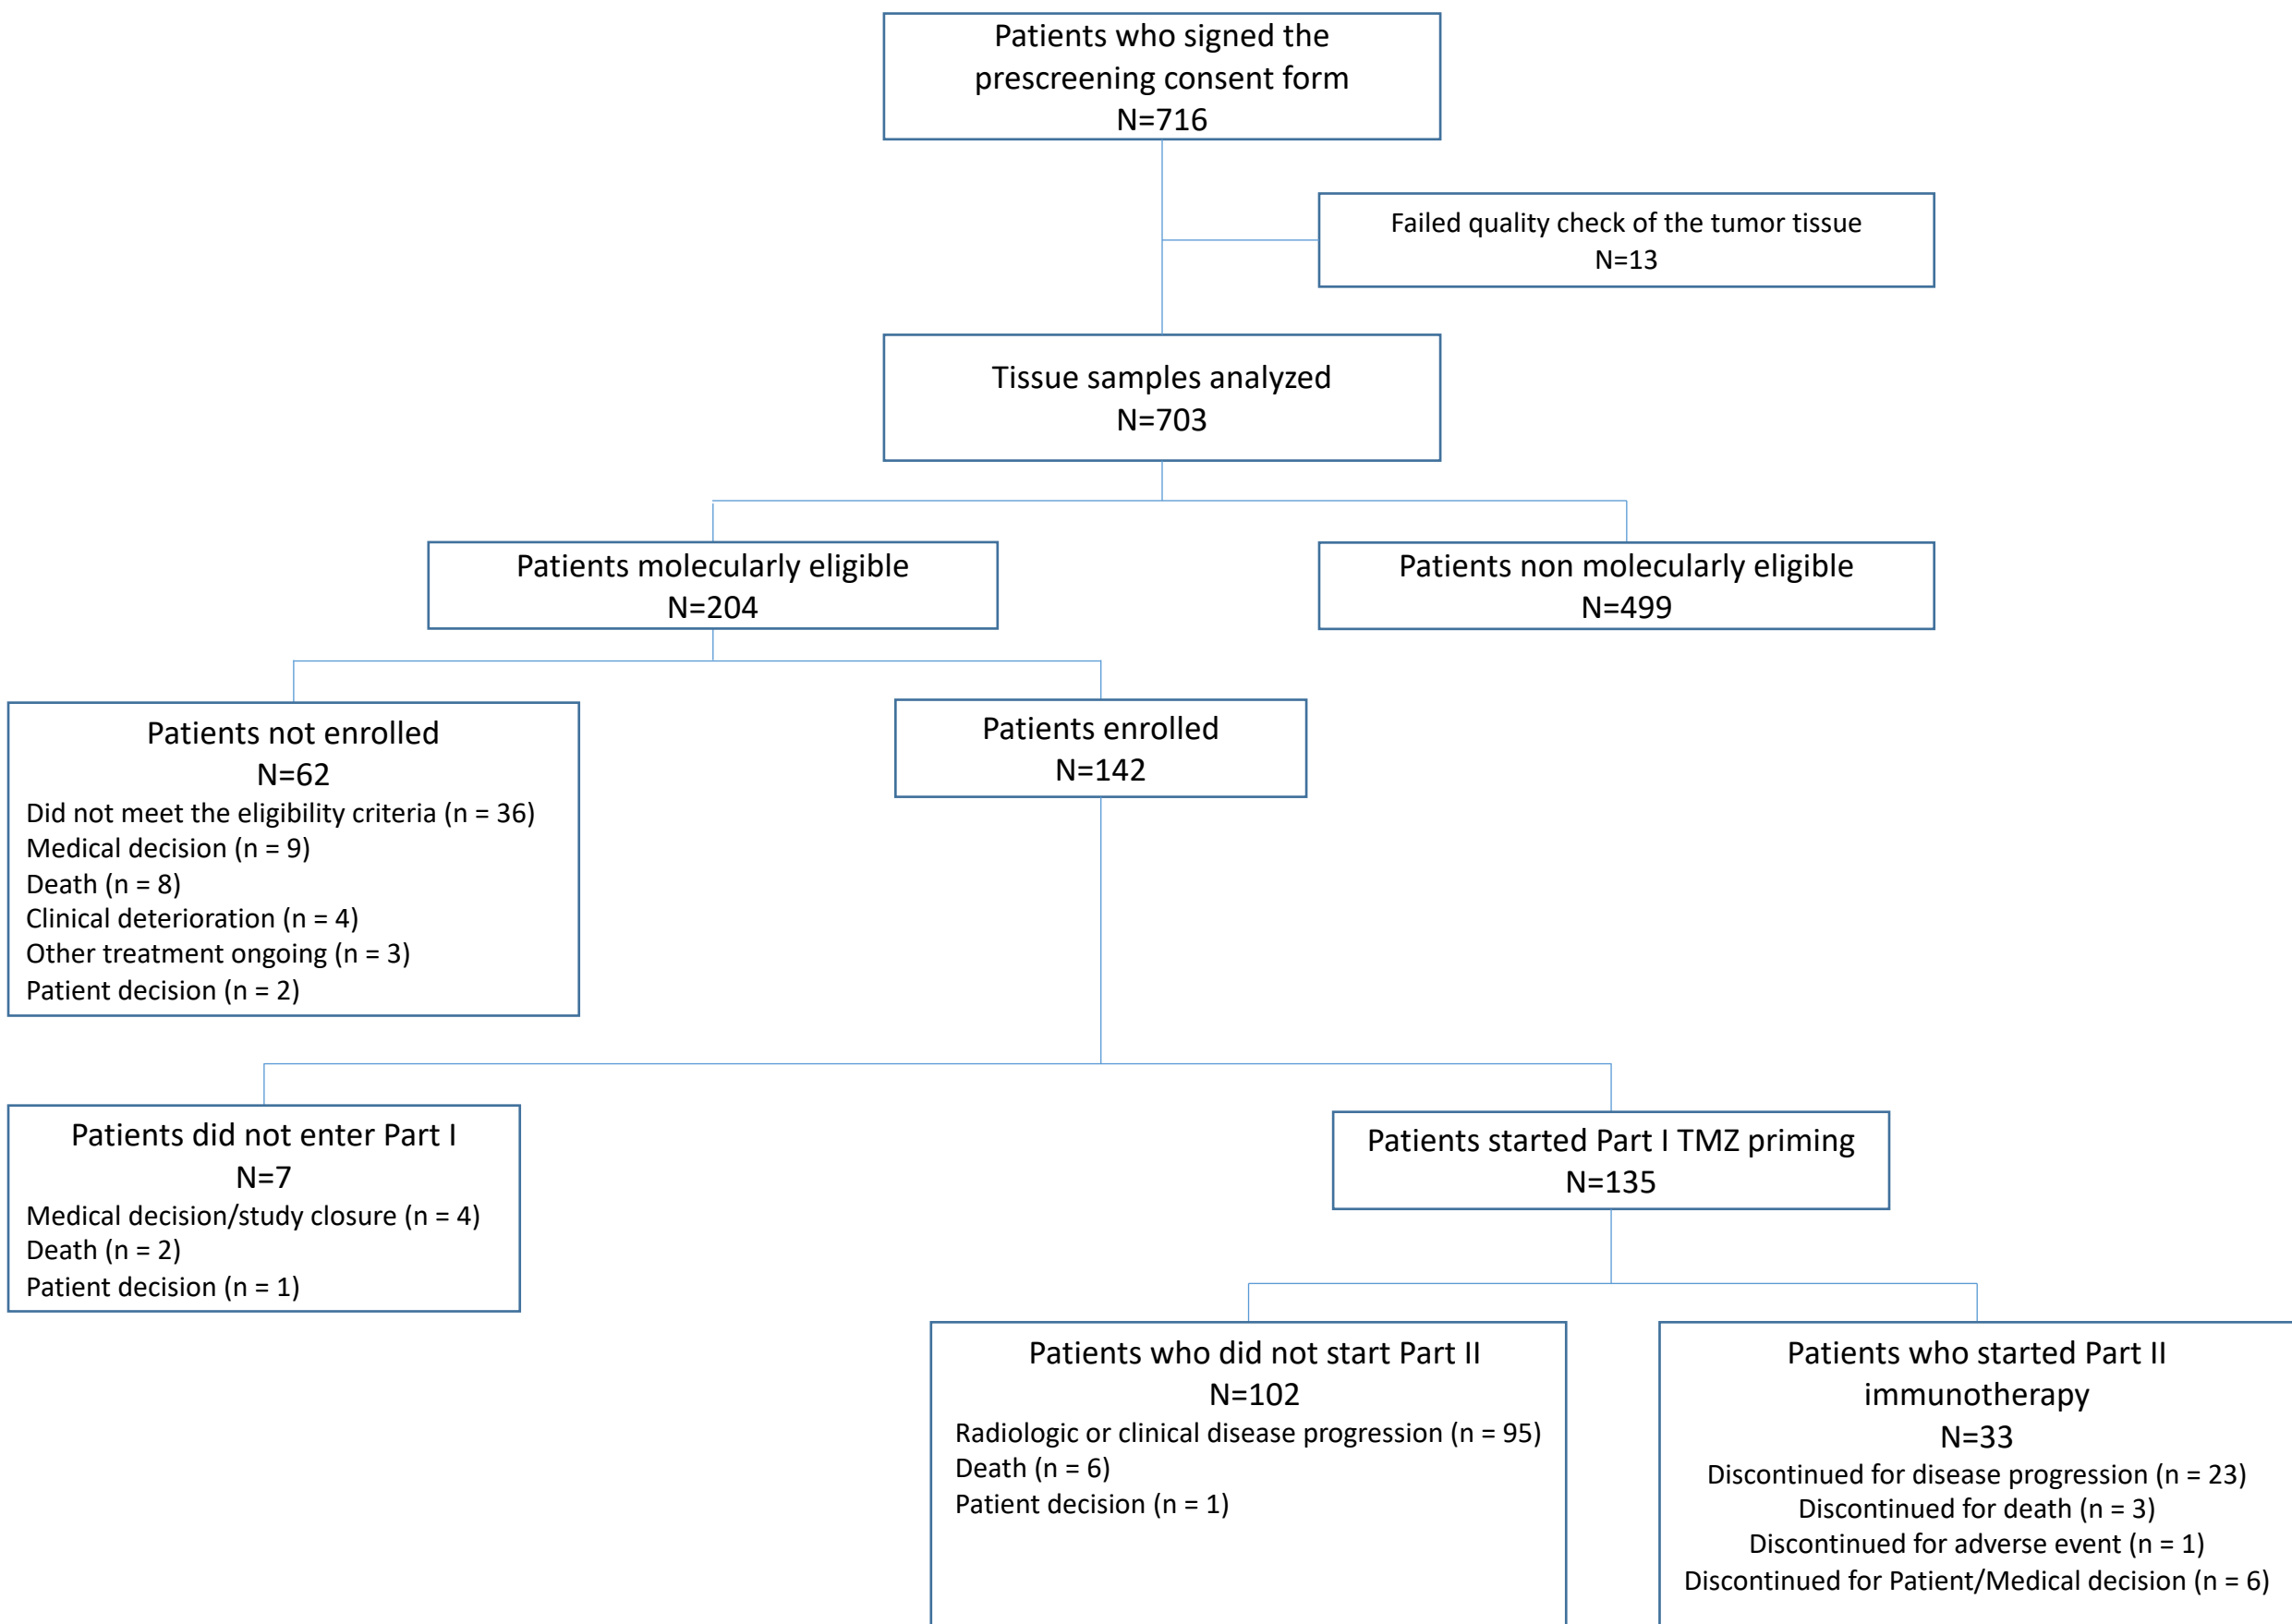

Supplement: Supplementary file 1 [file 27479f65e4a45e16fb9db7a1.pdf]

SUPPLEMENTARY FIGURE 6

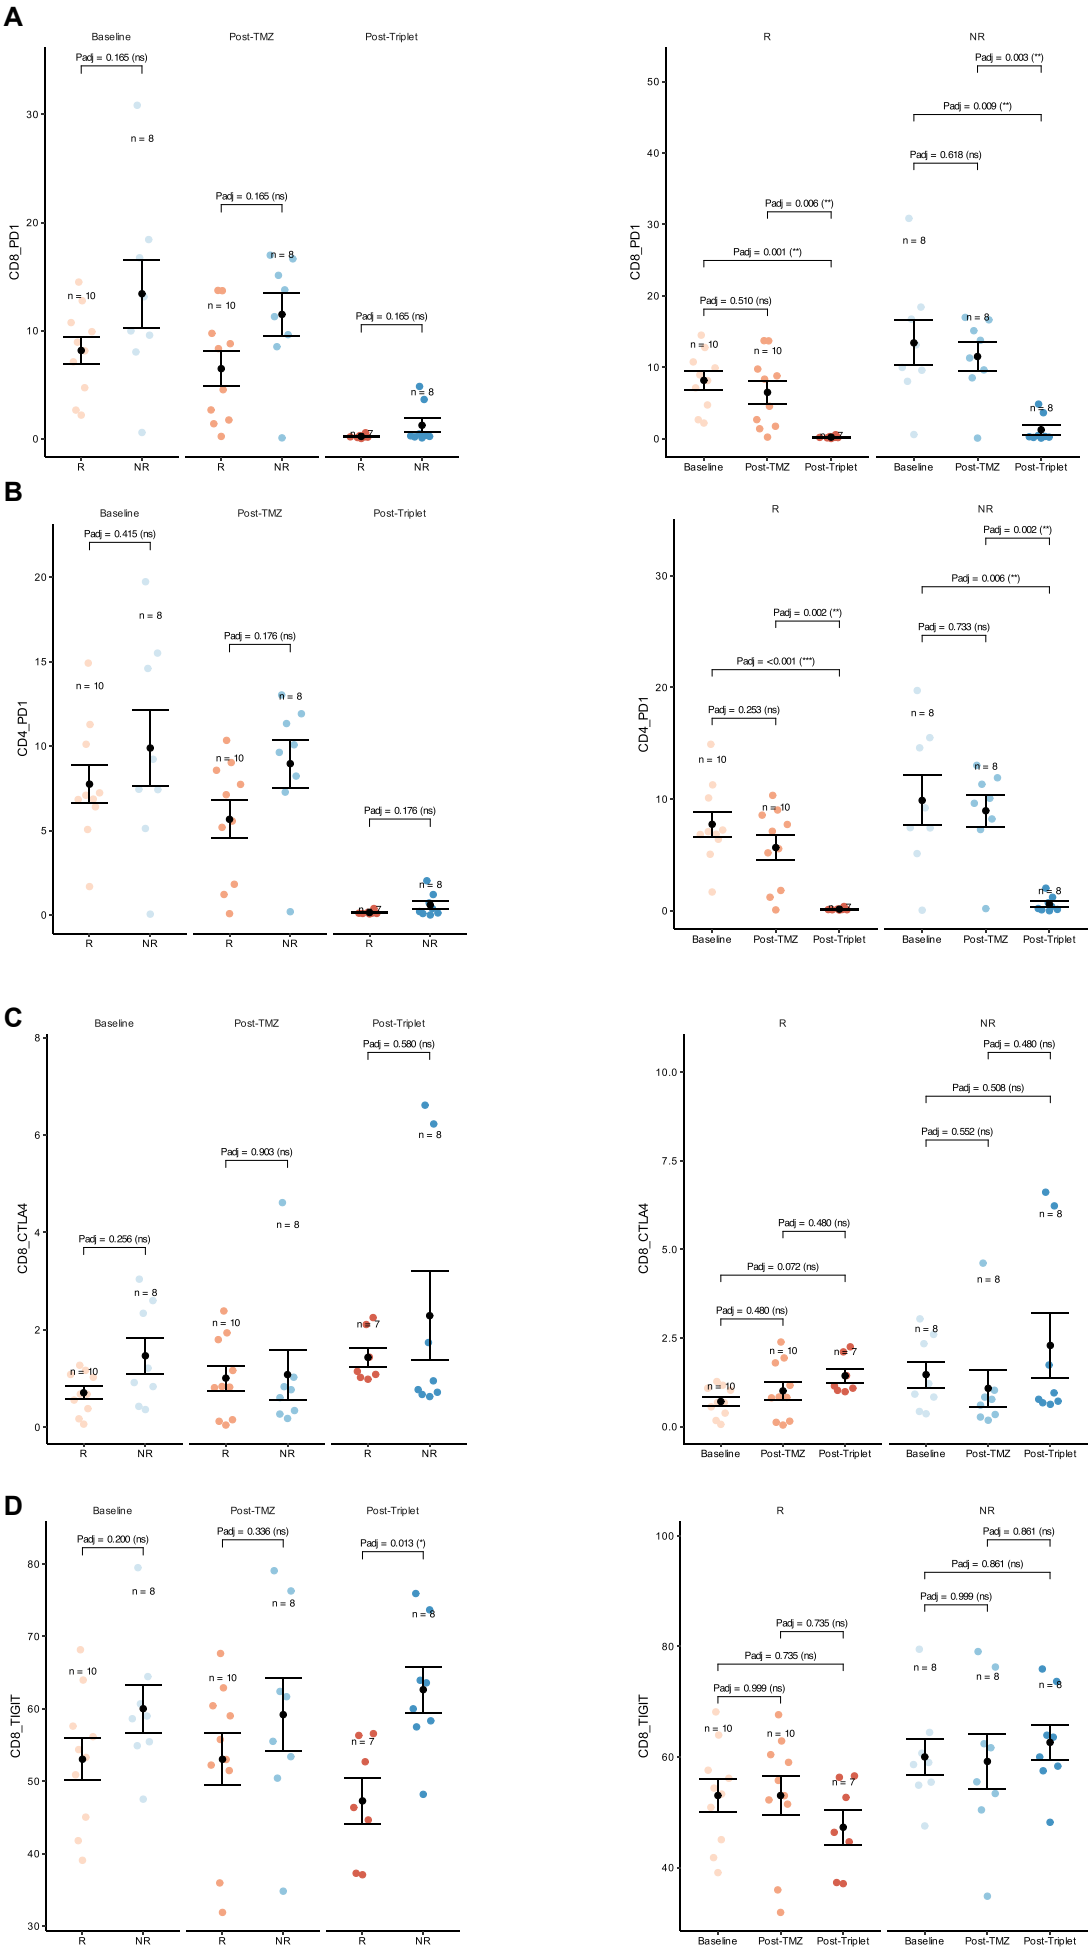

Supplement: Supplementary file 3 [file 8da9cd6487713e51d6ba41fb.pdf]
